# Supplementary material
Source: publisher figshare collection journal article supplement (https://frontiersin.figshare.com/ndownloader/files/26847716)
Supplement: Supplementary file [file 26847716]

Neuromodulation

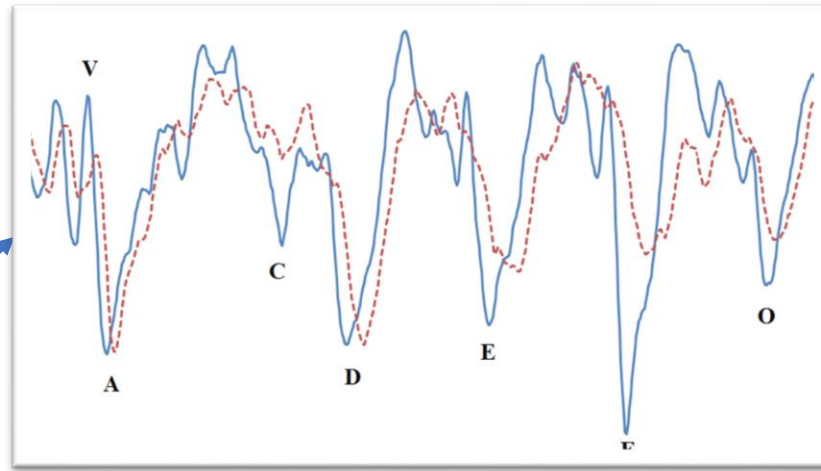

Function of Subcortex

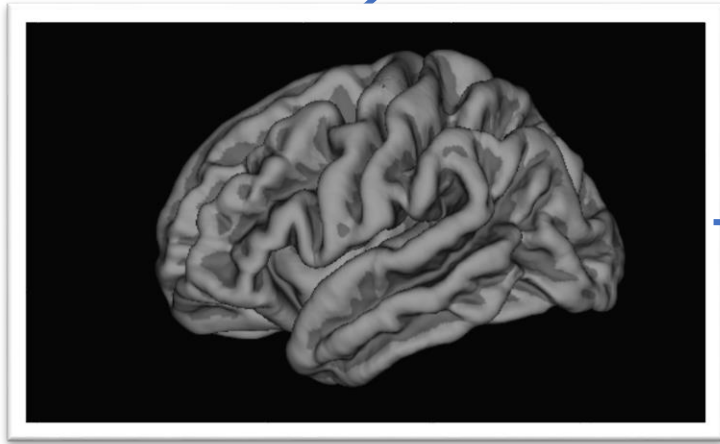

Structure of Cortex

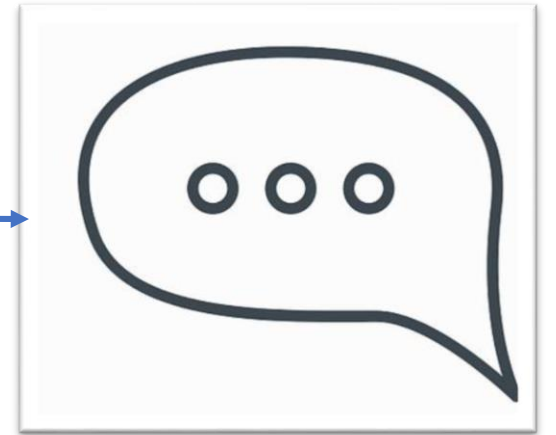

Ability of Language

**Figure 1 Hypothesized model among cortex, subcortex and language**
